# Supplementary material for: Norwilsonnol A, an immunosuppressive polycyclic polyprenylated acylphloroglucinol with a spiro[5-oxatricyclo[6.4.0.03,7]dodecane-6′,1-1′,2′-dioxane] system from Hypericum wilsonii
Source: Royal Society of Chemistry journal article supplement (doi:10.1039/d1qo00271f), 2021-01-01

## Supporting Information

# Norwilsonnol A, An Immunosuppressive Polycyclic Polyprenylated Acylphloroglucinol with Spiro[5- oxatricyclo[6.4.0.0<sup>3,7</sup>]dodecane-6',1-1',2'-dioxane] System from *Hypericum wilsonii*

Shuangshuang Xie,<sup>a,‡</sup> Yuan Zhou,<sup>a,‡</sup> Xiaosheng Tan,<sup>b,c,d,e,‡</sup> Weiguang Sun,<sup>a</sup> Yulin Duan,<sup>a</sup> Hao Feng,<sup>b,c,d,e</sup>  
Lingjuan Sun,<sup>b,c,d,e</sup> Yi Guo,<sup>a</sup> Zhengyi Shi,<sup>a</sup> Xincan Hao,<sup>f</sup> Gang Chen,<sup>b,c,d,e,\*</sup> Changxing Qi,<sup>a,\*</sup> and  
Yonghui Zhang<sup>a,\*</sup>

\*Corresponding authors

<sup>a</sup>Hubei Key Laboratory of Natural Medicinal Chemistry and Resource Evaluation, School of Pharmacy, Tongji Medical College, Huazhong University of Science and Technology, Wuhan 430030, People's Republic of China. E-mail: zhangyh@mails.tjmu.edu.cn (Y.Zhang), qichangxing@hust.edu.cn (C.Qi).

<sup>b</sup>Institute of Organ Transplantation, Tongji Hospital, Tongji Medical College, Huazhong University of Science and Technology, Wuhan 430030, Hubei Province, People's Republic of China. E-mail: gchen@tjh.tjmu.edu.cn (G.Chen).

<sup>c</sup>Key Laboratory of Organ Transplantation, Ministry of Education, Wuhan 430030, Hubei Province, People's Republic of China. E-mail: gchen@tjh.tjmu.edu.cn (G.Chen).

<sup>d</sup>NHC Key Laboratory of Organ Transplantation, Wuhan 430030, Hubei Province, People's Republic of China. E-mail: gchen@tjh.tjmu.edu.cn (G.Chen)

<sup>e</sup>Key Laboratory of Organ Transplantation, Chinese Academy of Medical Sciences, Wuhan 430030, Hubei Province, People's Republic of China. E-mail: gchen@tjh.tjmu.edu.cn (G.Chen)

<sup>f</sup>Hubei Key Laboratory of Wudang Local Chinese Medicine Research, Hubei Engineering Technology Center for Comprehensive Utilization of Medicinal Plants, College of Pharmacy, Hubei University of Medicine, Shiyan 442000, People's Republic of China

---

\*Corresponding author Tel.: (86) 27-83692892

\*E-mail: zhangyh@mails.tjmu.edu.cn (Y.Zhang)

\*E-mail: qichangxing@hust.edu.cn (C.Qi)

\*E-mail: gchen@tjh.tjmu.edu.cn (G.Chen)

## Contents of Supporting Information

|                                                                      |      |
|----------------------------------------------------------------------|------|
| Table S1. $^1\text{H}$ and $^{13}\text{C}$ NMR Data for 1 and 2..... | 3    |
| Figures S1–S6. NMR spectrums of 1.....                               | 4–6  |
| Figure S7. HRESIMS of 1.....                                         | 7    |
| Figure S8. UV spectrum of 1.....                                     | 7    |
| Figure S9. IR spectrum of 1.....                                     | 8    |
| Figures S10–S15. NMR spectrums of 2.....                             | 8–11 |
| Figure S16. HRESIMS of 2.....                                        | 11   |
| Figure S17. UV spectrum of 2.....                                    | 12   |
| Figure S18. IR spectrum of 2.....                                    | 12   |

**Table S1** The  $^1\text{H}$  and  $^{13}\text{C}$  NMR spectroscopic data of **1** and **2** ( $\delta$  in ppm)

| No.   | <b>1<sup>a</sup></b>  |                      | <b>2<sup>b</sup></b>             |                      |
|-------|-----------------------|----------------------|----------------------------------|----------------------|
|       | $\delta_{\text{H}}$   | $\delta_{\text{C}}$  | $\delta_{\text{H}}$              | $\delta_{\text{C}}$  |
| 1     |                       | 71.6 C               |                                  | 118.0 C              |
| 3     |                       |                      | 2.59 m                           | 40.3 CH <sub>2</sub> |
| 4     |                       |                      |                                  | 209.6 C              |
| 5     |                       | 83.8 C               |                                  | 65.8 C               |
| 6     | 1.77 m<br>1.71 m      | 36.9 CH <sub>2</sub> | 2.04 (d, 13.1)<br>1.79 (d, 13.1) | 32.3 CH <sub>2</sub> |
| 7     | 1.99 m                | 33.8 CH              | 1.97 m                           | 42.3 CH              |
| 8     |                       | 55.7 C               |                                  | 51.2 C               |
| 9     |                       | 205.1 C              |                                  | 195.0 C              |
| 10    |                       | 148.3 C              |                                  | 164.0 C              |
| 11    |                       | 105.9 C              |                                  | 129.5 C              |
| 12    | 1.62 s                | 18.7 CH <sub>3</sub> | 8.00 (d, 6.9)                    | 130.0 CH             |
| 13    | 1.20 s                | 22.6 CH <sub>3</sub> | 7.38 (t, 7.3)                    | 127.8 CH             |
| 14    | 1.95 m                | 36.1 CH <sub>2</sub> | 7.43 (t, 7.2)                    | 131.6 CH             |
|       | 1.25 (dd, 13.2, 10.7) |                      |                                  |                      |
| 15    | 3.96 (dt, 10.7, 5.3)  | 67.0 CH              | 7.38 (t, 7.3)                    | 127.8 CH             |
| 16    |                       | 82.2 C               | 8.00 (d, 6.9)                    | 130.0 CH             |
| 17    | 1.17 s                | 17.1 CH <sub>3</sub> | 2.29 m                           | 23.1 CH <sub>2</sub> |
| 18    | 0.98 s                | 23.9 CH <sub>3</sub> | 5.10 (t, 7.1)                    | 123.4 CH             |
| 19    | 2.02 m<br>1.64 m      | 29.6 CH <sub>2</sub> |                                  | 132.6 C              |
| 20    | 5.08 (t, 7.0)         | 123.4 C              | 1.67 s                           | 25.8 CH <sub>3</sub> |
| 21    |                       | 132.1 C              | 1.62 s                           | 17.8 CH <sub>3</sub> |
| 22    | 1.69 s                | 25.6 CH <sub>3</sub> | 2.57 m<br>2.51 (dd, 14.6, 7.9)   | 34.6 CH <sub>2</sub> |
| 23    | 1.57 s                | 17.7 CH <sub>3</sub> | 5.01 m                           | 120.0 CH             |
| 24    | 0.91 s                | 18.1 CH <sub>3</sub> |                                  | 134.4 C              |
| 25    | 1.64 m<br>1.20 m      | 38.0 CH <sub>2</sub> | 1.61 s                           | 26.1 CH <sub>3</sub> |
| 26    | 1.93 m<br>1.87 m      | 25.0 CH <sub>2</sub> | 1.51 s                           | 18.1 CH <sub>3</sub> |
| 27    | 2.88 (d, 9.0)         | 58.1 CH              | 2.15 (dd, 13.6, 5.3)<br>1.70 m   | 28.5 CH <sub>2</sub> |
| 28    |                       | 82.3 C               | 5.01 m                           | 122.2 CH             |
| 29    | 0.98 s                | 28.3 CH <sub>3</sub> |                                  | 133.5 C              |
| 30    | 1.21 s                | 24.9 CH <sub>3</sub> | 1.70 s                           | 26.0 CH <sub>3</sub> |
| 31    |                       |                      | 1.59 s                           | 18.0 CH <sub>3</sub> |
| 32    |                       |                      | 1.14 s                           | 17.0 CH <sub>3</sub> |
| 33    |                       |                      | 4.78 (d, 7.8)                    | 93.8 CH              |
| 34    |                       |                      | 5.99 (dd, 15.5, 7.8)             | 122.0 CH             |
| 35    |                       |                      | 6.17 (d, 15.6)                   | 144.7 CH             |
| 36    |                       |                      |                                  | 71.0 C               |
| 37    |                       |                      | 1.39 s                           | 30.0 CH <sub>3</sub> |
| 38    |                       |                      | 1.38 s                           | 29.8 CH <sub>3</sub> |
| 15-OH | 4.99 (d, 5.2)         |                      |                                  |                      |

<sup>a</sup> Recorded in DMSO-*d*<sub>6</sub>, 400 MHz for  $^1\text{H}$  and 100 MHz for  $^{13}\text{C}$  NMR spectroscopic data.

<sup>b</sup> Recorded in Chloroform-*d*, 400 MHz for  $^1\text{H}$  and 100 MHz for  $^{13}\text{C}$  NMR spectroscopic data.

Figure S1.  $^1\text{H}$  NMR spectrum of **1**.

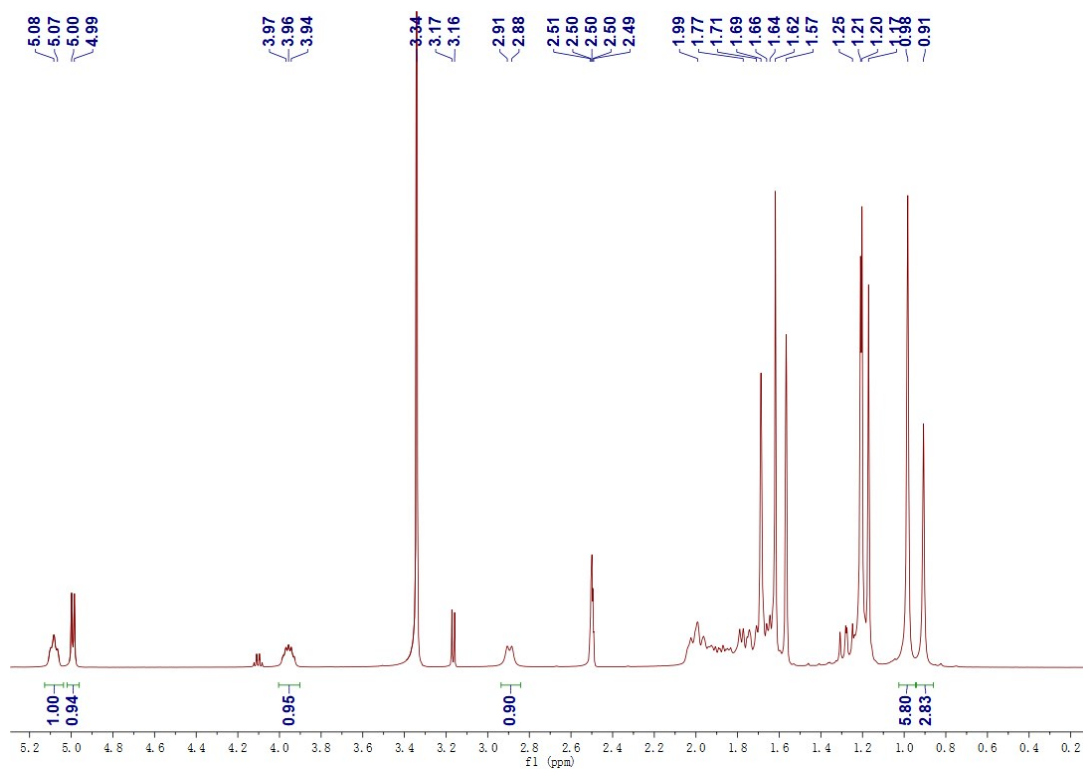

Figure S2.  $^{13}\text{C}$  and DEPT NMR spectra of **1**.

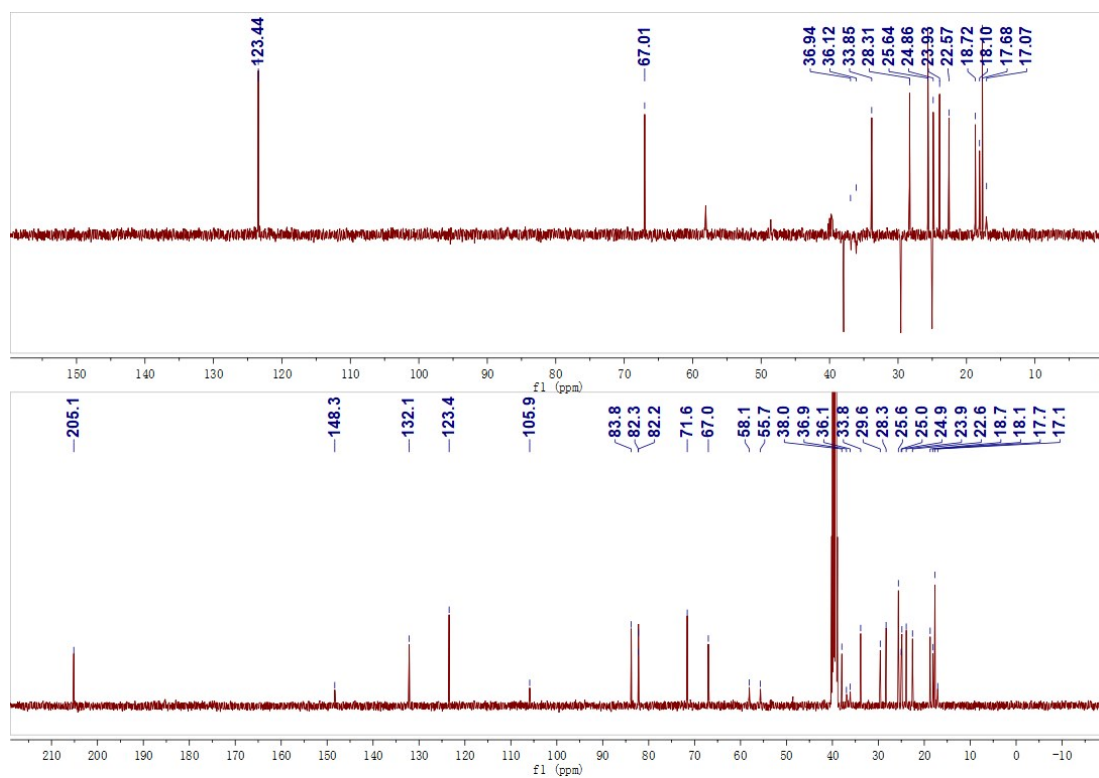

**Figure S3.** HSQC spectrum of **1**.

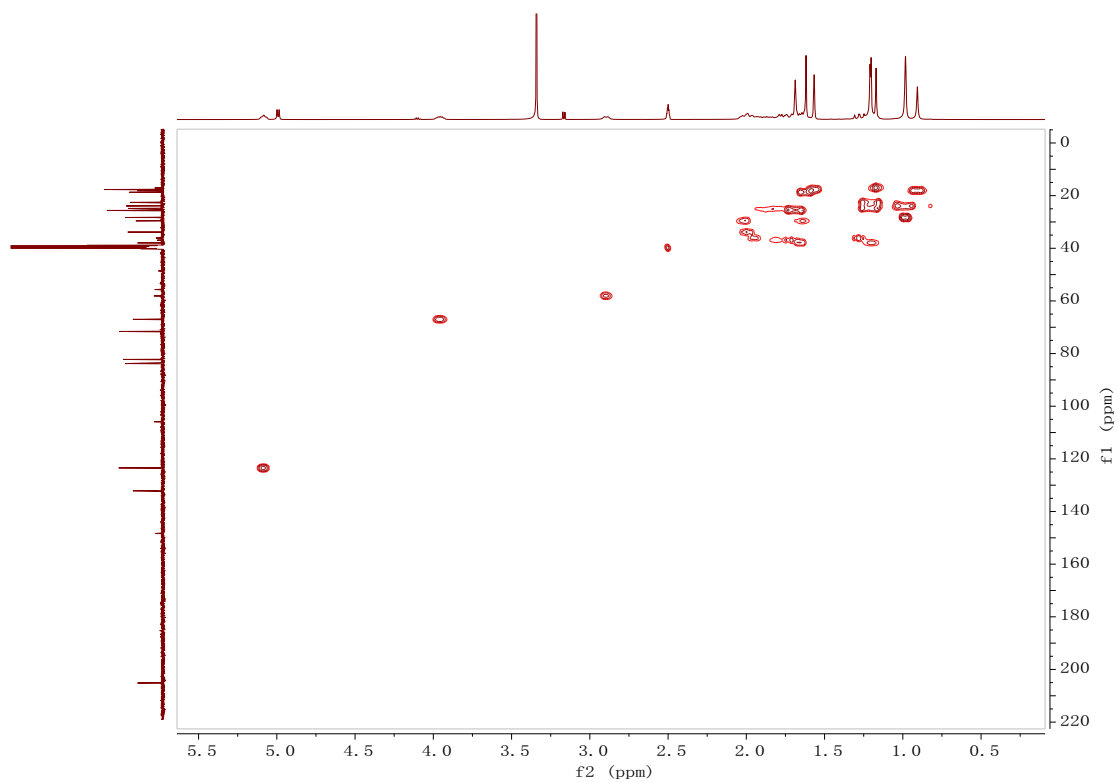

**Figure S4.** HMBC spectrum of **1**.

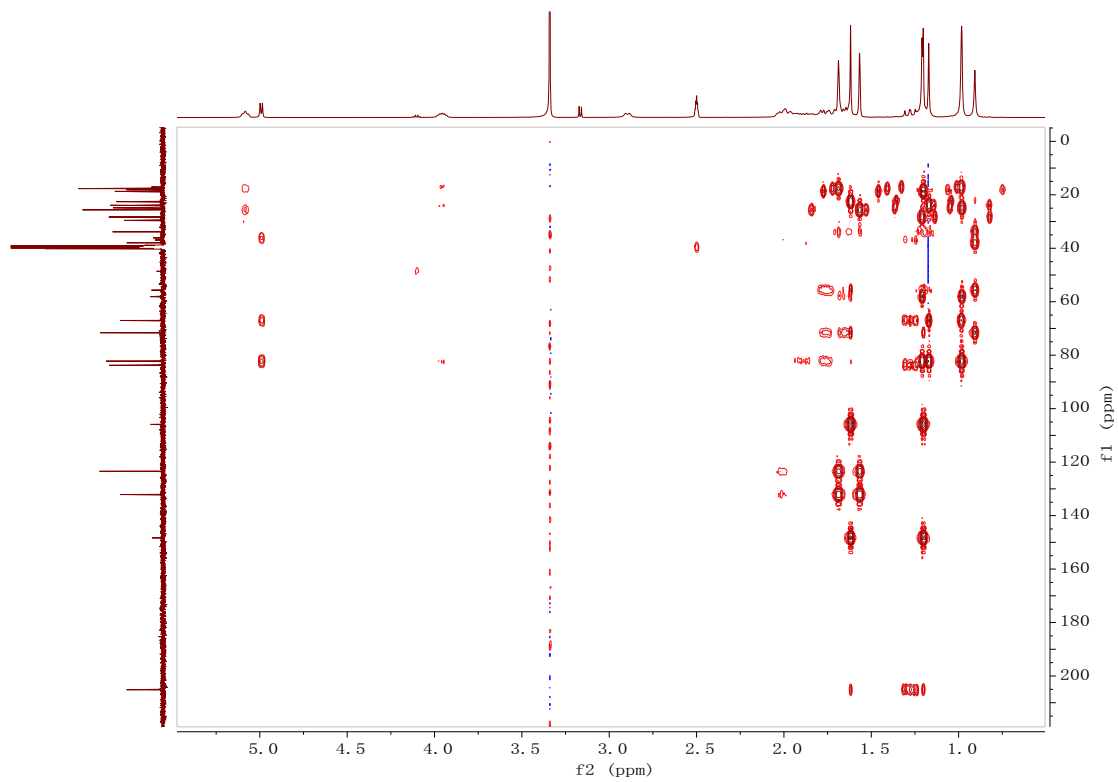

**Figure S5.**  $^1\text{H}$ - $^1\text{H}$  COSY spectrum of **1**.

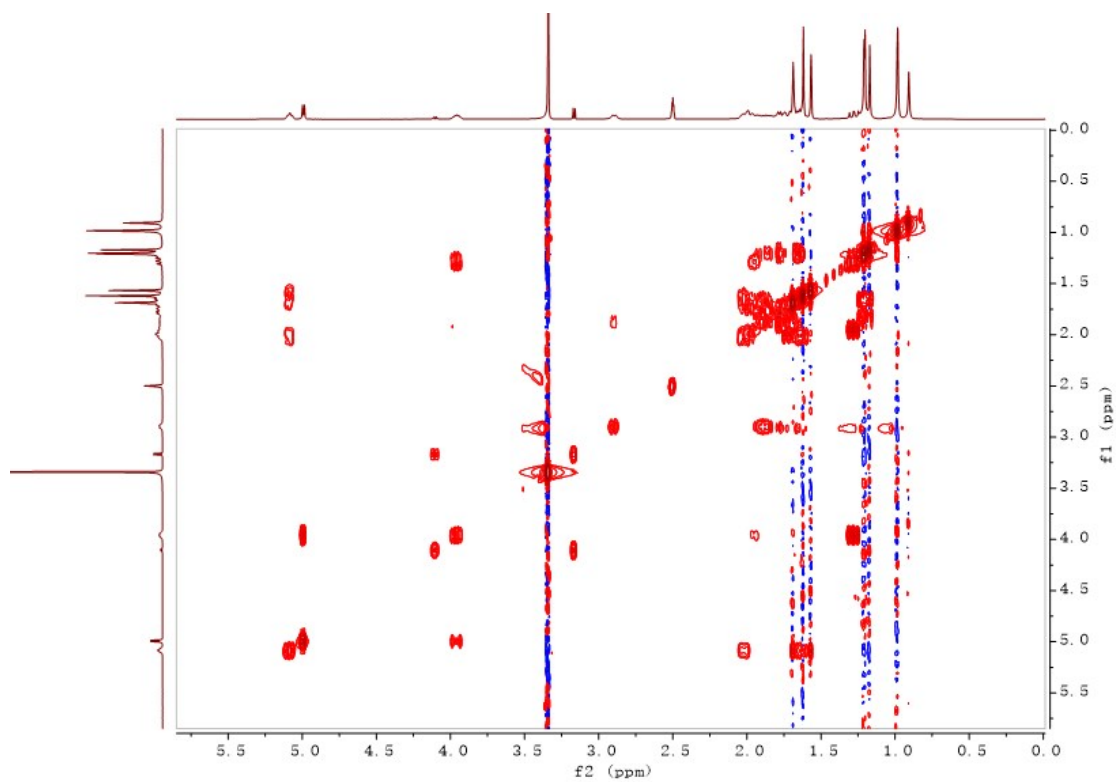

**Figure S6.** NOESY spectrum of **1**.

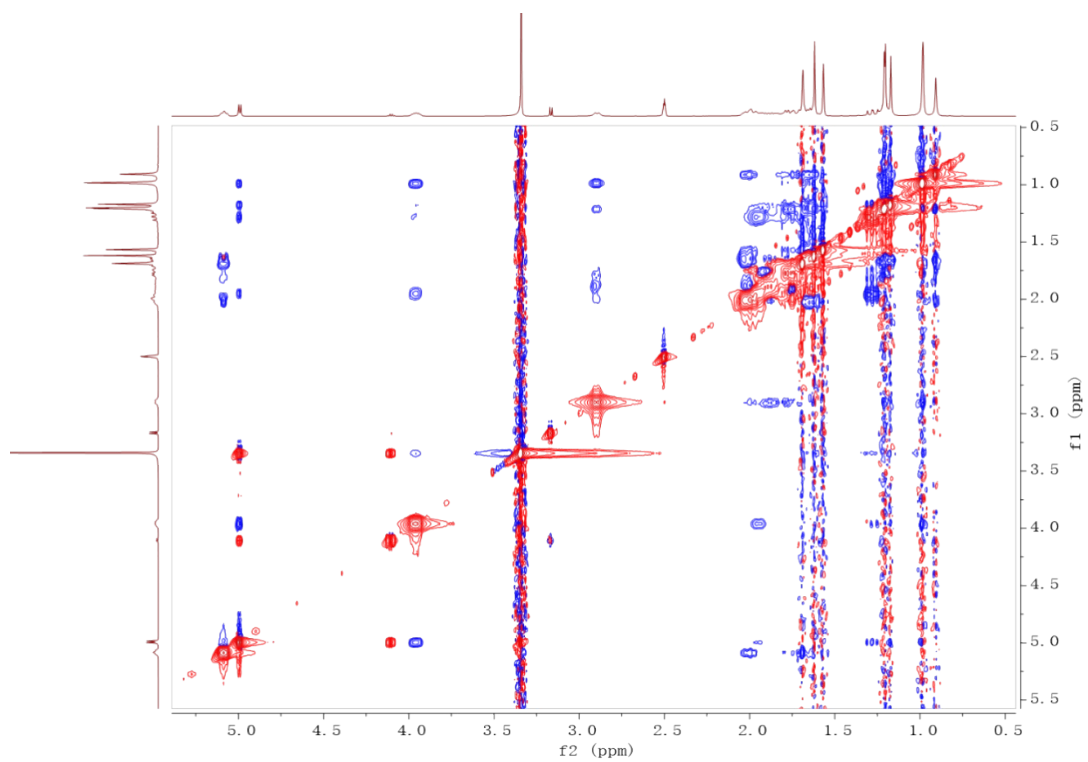

**Figure S7.** HRESIMS spectrum of **1**.

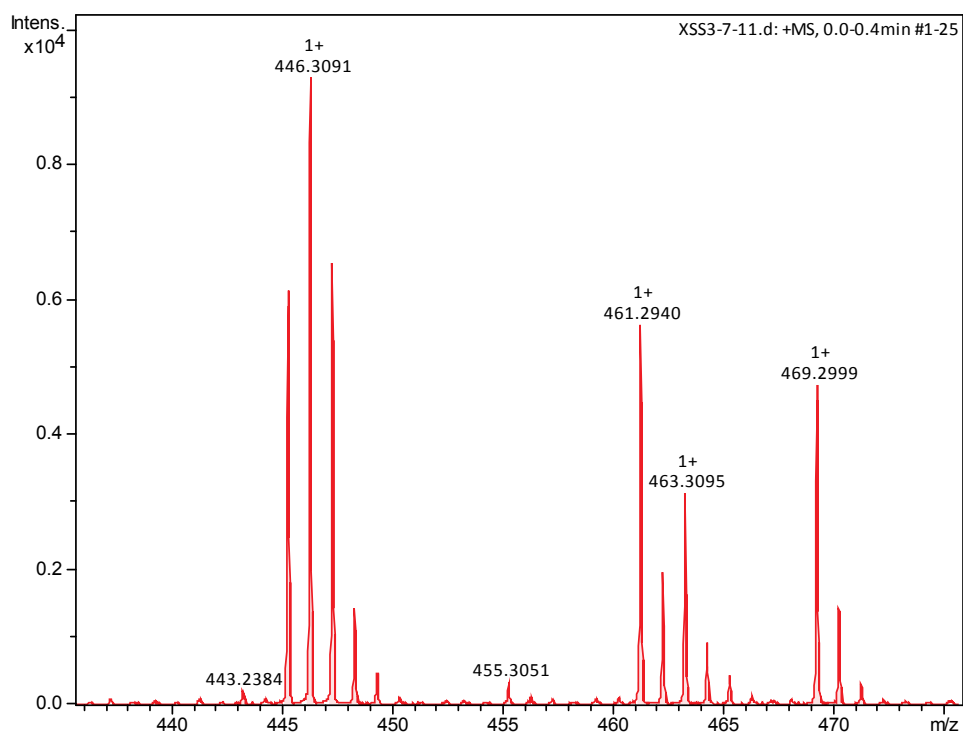

**Figure S8.** UV spectrum of **1**.

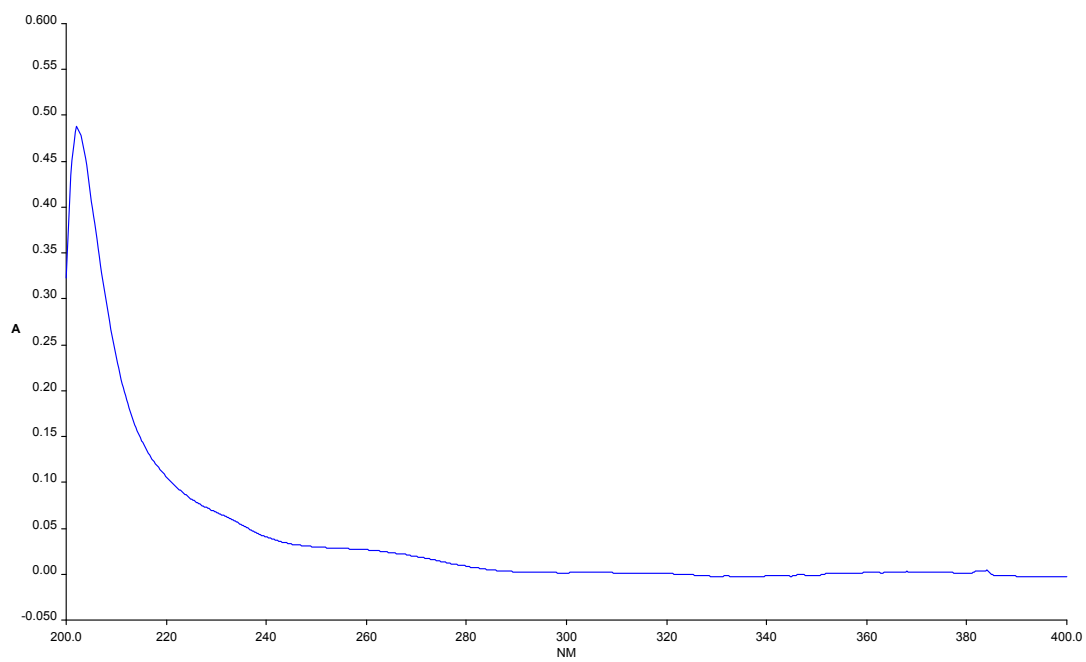

Figure S9. IR spectrum of 1.

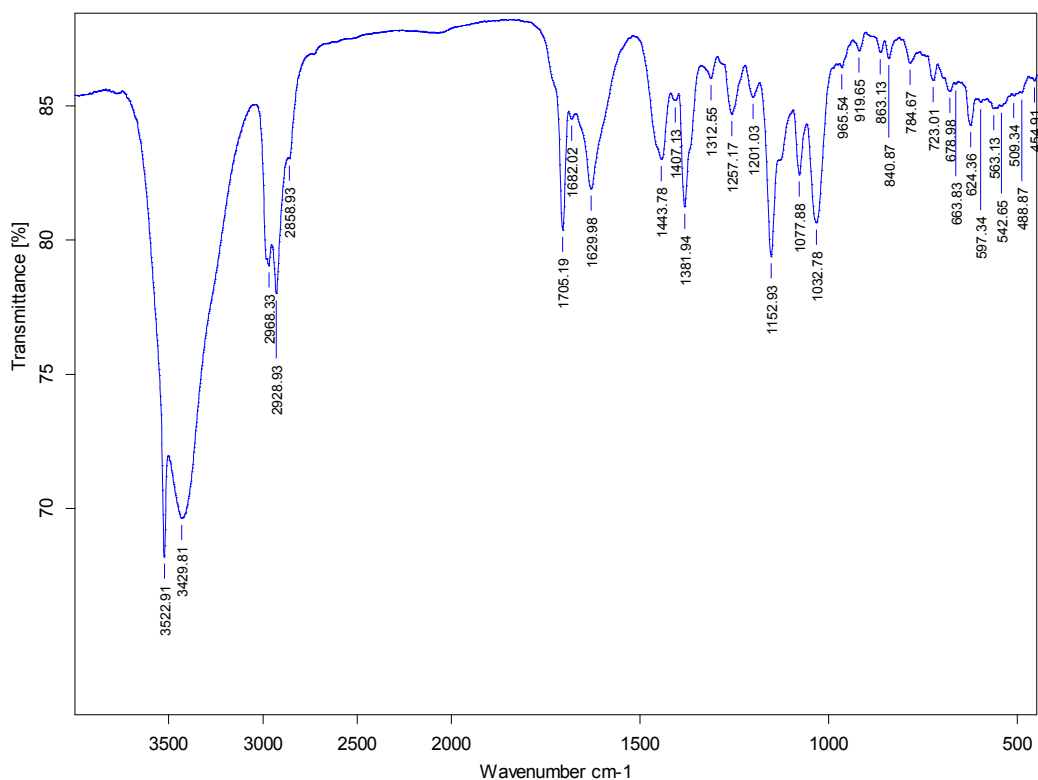

Figure S10. <sup>1</sup>H NMR spectrum of 2.

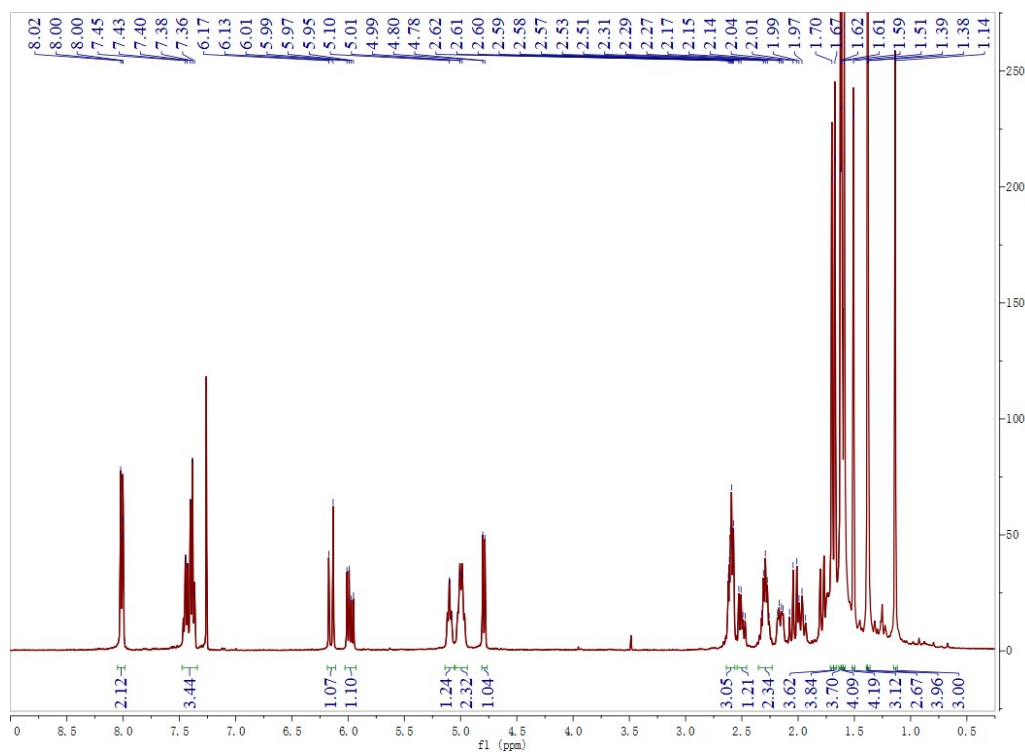



**Figure S11.**  $^{13}\text{C}$  and DEPT NMR spectra of **2**.

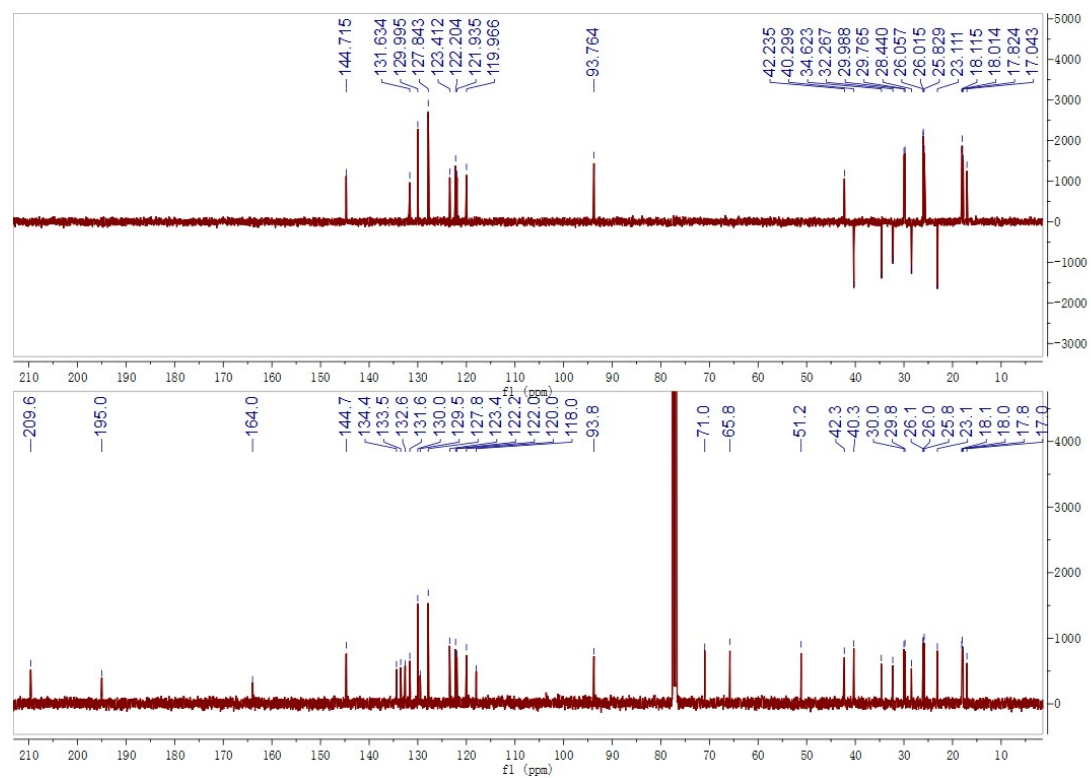

**Figure S12.** HSQC spectrum of **2**.

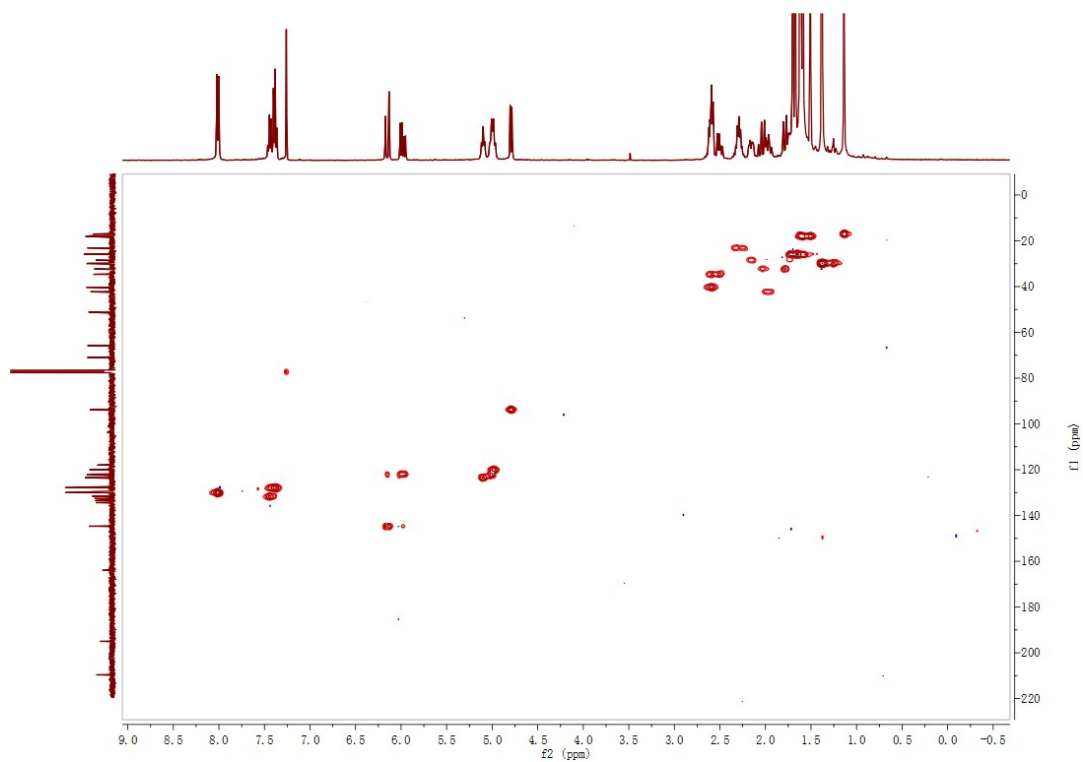

Figure S13. HMBC spectrum of **2**.

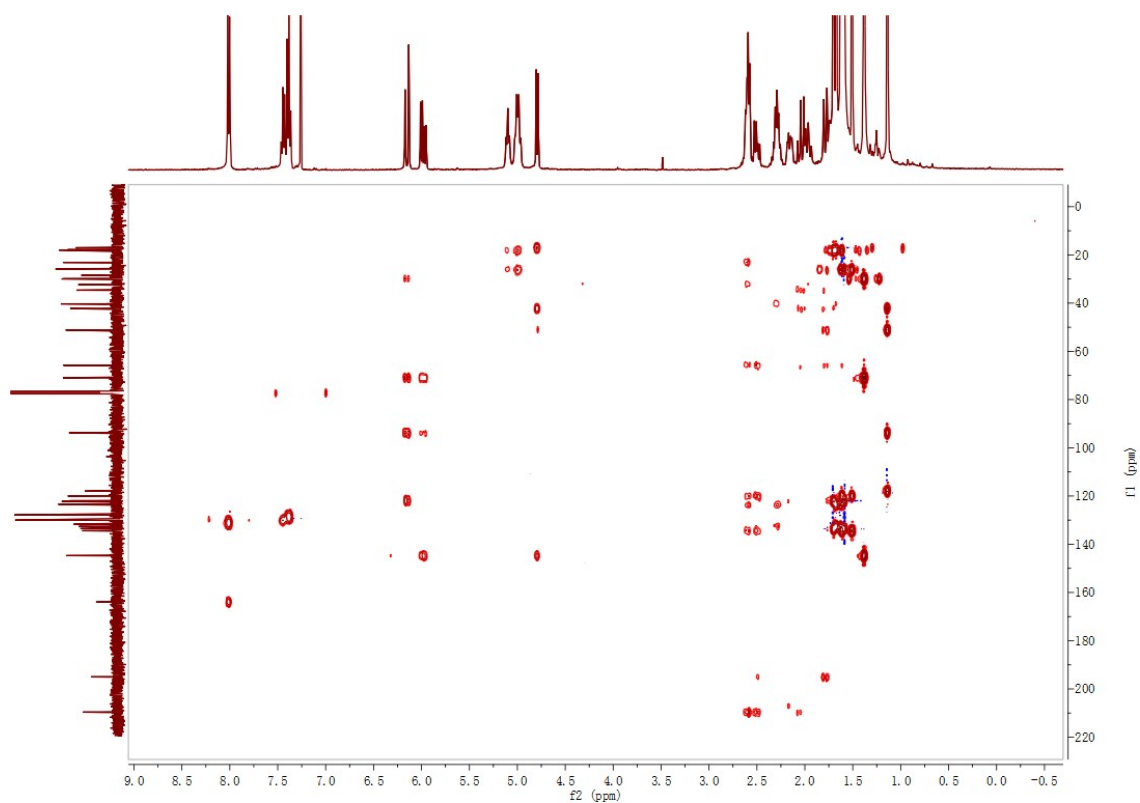

Figure S14.  $^1\text{H}$ - $^1\text{H}$  COSY spectrum of **2**.

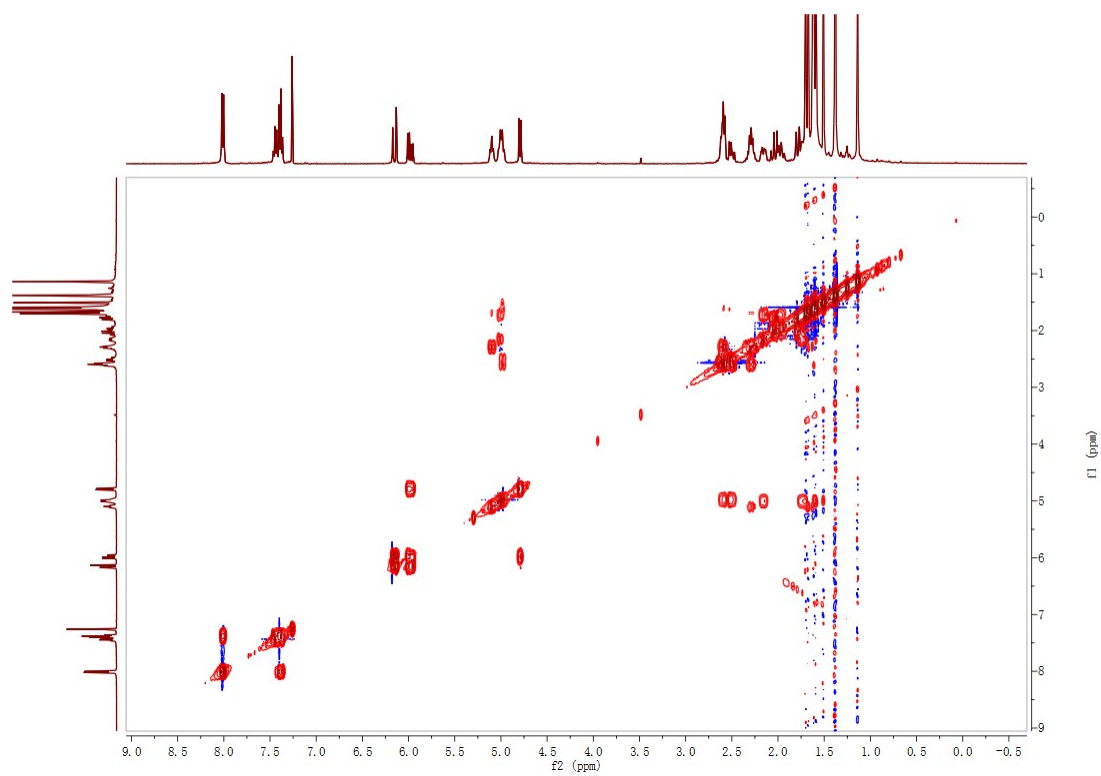

**Figure S15.** NOESY spectrum of **2**.

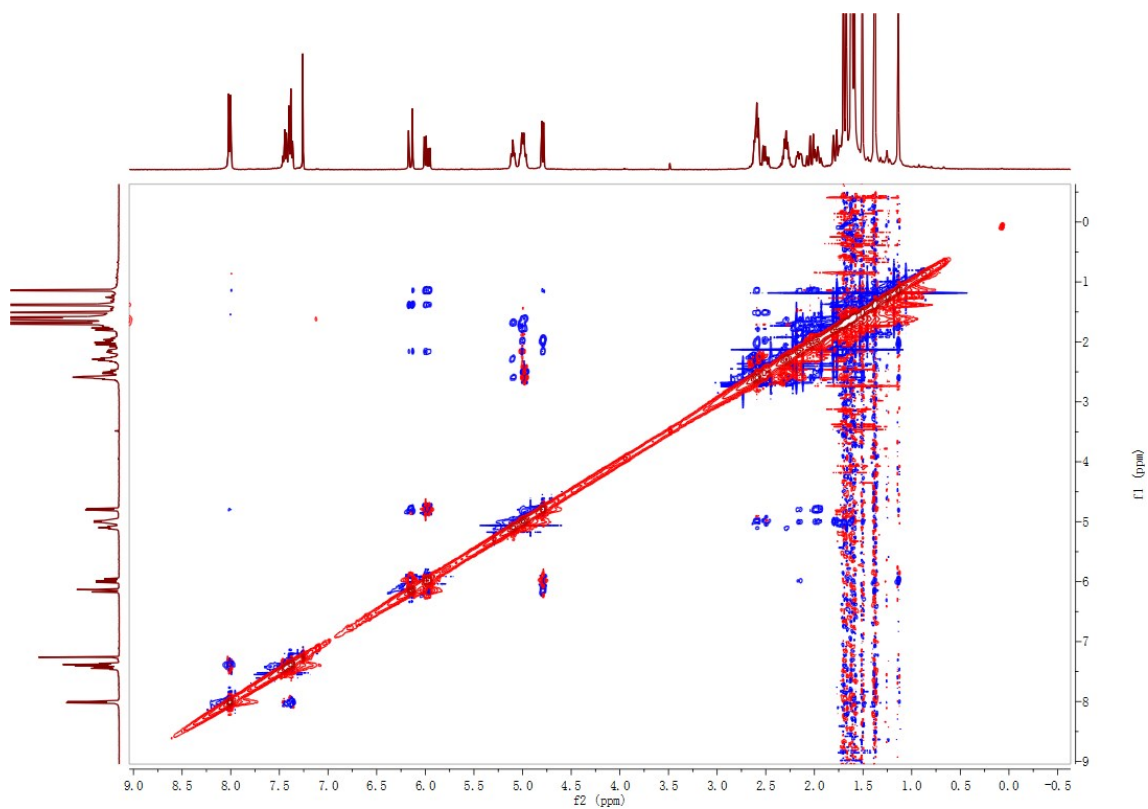

**Figure S16.** HRESIMS spectrum of **2**.

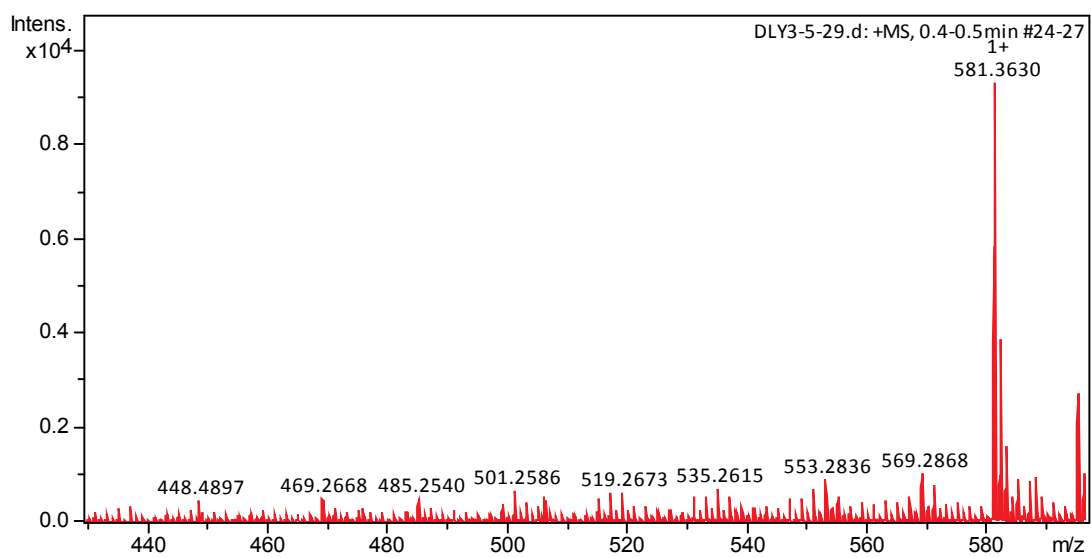

Figure S17. UV spectrum of 2.

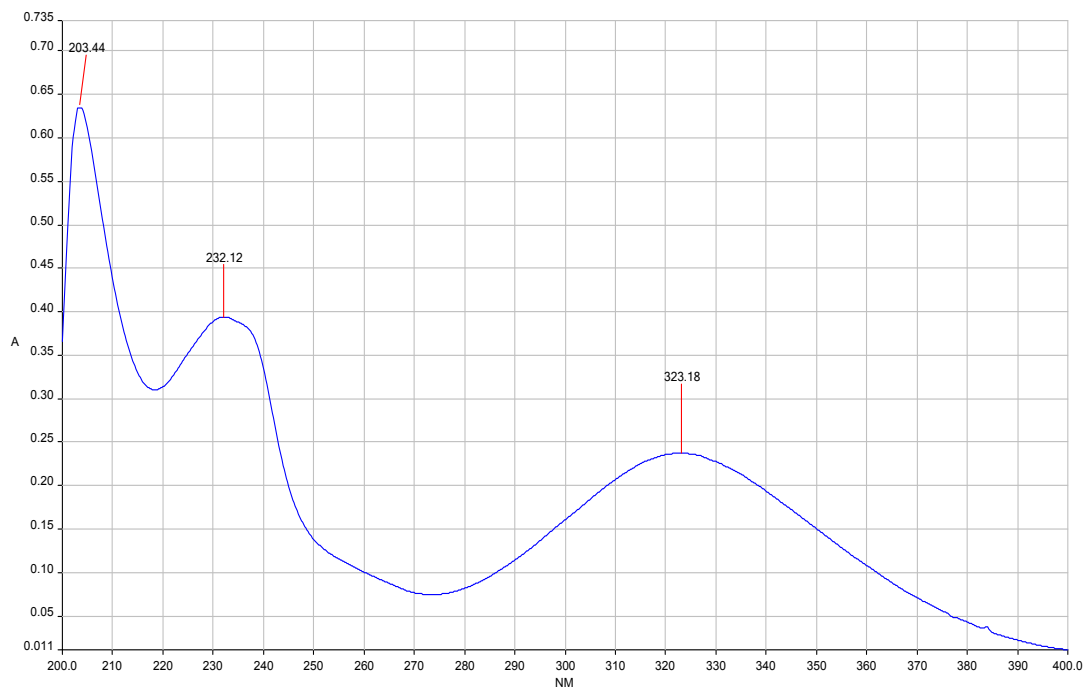

Figure S18. IR spectrum of 2.

E:\20200918\20200918 □ □ □ 13-5-29.0

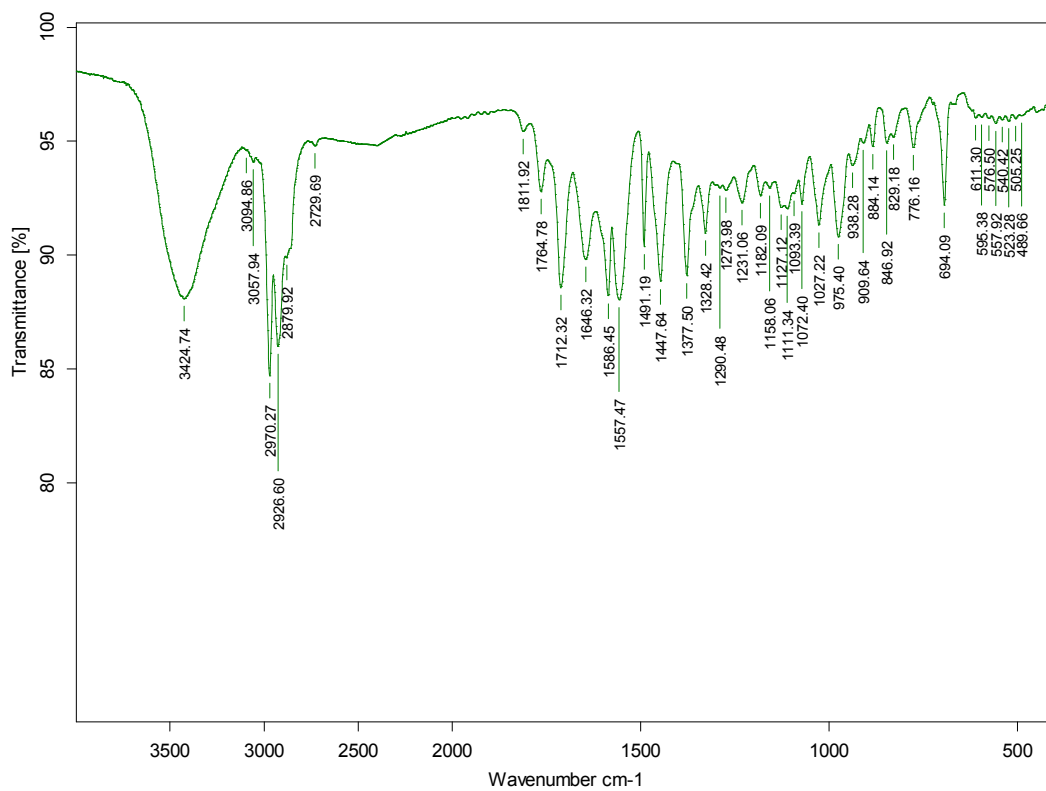

Supplement: d1qo00271f1.pdf [file d1qo00271f1.pdf]
